# Supplementary material
Source: PubMed Central journal article supplement (PMC8006805)
Supplement: NIHMS1680216-supplement-Online_Resource_1.pdf [file NIHMS1680216-supplement-Online_Resource_1.pdf]

## Online Resource 1

Early changes in bone turnover predict longer-term changes in bone mineral density but not trabecular bone score in frail older women

Archives of Osteoporosis

Mary P. Kotlarczyk<sup>1</sup>, PhD; Subashan Perera, PhD<sup>1</sup>; Neil M. Resnick, MD<sup>1</sup>; David A. Nace, MD, MPH<sup>1</sup>; Susan L. Greenspan, MD<sup>1</sup>

<sup>1</sup>Division of Geriatrics, Department of Medicine, University of Pittsburgh, Pittsburgh, PA

Corresponding author: Mary P. Kotlarczyk, PhD; email: mpk38@pitt.edu

Supplementary Table 1: Descriptive Statistics of Skeletal Measures by Bone Turnover Marker Category (mean ± standard deviation)

| Shorter-Term 6-Month<br>Change in Marker of Bone<br>Turnover | Longer-Term Percent Change in Skeletal Measures |           |               |             |                  |            |             |             |
|--------------------------------------------------------------|-------------------------------------------------|-----------|---------------|-------------|------------------|------------|-------------|-------------|
|                                                              | Spine BMD                                       |           | Total Hip BMD |             | Femoral Neck BMD |            | TBS         |             |
|                                                              | 12 Months                                       | 24 Months | 12 Months     | 24 Months   | 12 Months        | 24 Months  | 12 Months   | 24 Months   |
| CTX Change:                                                  |                                                 |           |               |             |                  |            |             |             |
| Tertile 1<br>(<-0.14 ng/ml)                                  | 2.7 ± 4.0                                       | 4.3 ± 4.7 | 0.02 ± 0.03   | 0.01 ± 0.03 | 2.2 ± 6.8        | -0.6 ± 4.4 | -1.2 ± 6.4  | -1.7 ± 6.8  |
| Tertile 2<br>(-0.14 to 0.03 ng/ml)                           | 1.7 ± 4.7                                       | 1.8 ± 6.2 | 1.2 ± 4.2     | 0.9 ± 4.8   | 0.5 ± 4.5        | -1.5 ± 5.3 | -3.3 ± 12.1 | -3.1 ± 11.6 |
| Tertile 3<br>(>0.03 ng/ml)                                   | 1.2 ± 3.4                                       | 0.8 ± 4.4 | -0.2 ± 3.7    | -1.4 ± 5.6  | -1.1 ± 5.5       | -2.3 ± 6.0 | 0.9 ± 5.9   | 0.6 ± 5.3   |
| PINP Change:                                                 |                                                 |           |               |             |                  |            |             |             |
| Tertile 1<br>(<-17.2 ng/ml)                                  | 3.4 ± 5.0                                       | 4.7 ± 5.6 | 1.9 ± 4.5     | 1.2 ± 4.2   | 1.7 ± 6.8        | -0.7 ± 5.4 | -1.9 ± 11.5 | -3.6 ± 11.3 |
| Tertile 2<br>(-17.2 to -0.1 ng/ml)                           | 1.6 ± 3.6                                       | 2.0 ± 5.7 | 1.54 ± 3.9    | 1.9 ± 4.7   | 0.2 ± 5.4        | -0.4 ± 5.4 | -1.0 ± 6.8  | -1.8 ± 7.2  |
| Tertile 3<br>(>-0.1 ng/ml)                                   | 0.7 ± 3.2                                       | 0.1 ± 3.6 | -0.03 ± 3.9   | -1.5 ± 5.6  | -0.2 ± 4.7       | -3.3 ± 4.6 | -0.6 ± 7.3  | 1.0 ± 5.2   |
